# Supplementary material
Source: publisher figshare collection journal article supplement (https://acs.figshare.com/ndownloader/files/4557412)
Supplement: Supplementary file 1 [file 4557412]

data_Pr1

#====================================================================

# 1. SUBMISSION DETAILS

_publ_contact_author          # Name and address of author for correspondence
;
 Hong Deng
 School of Chemistry and Environment
 South China Nomal University 
 Guangzhou 510006
 P. R. China
;
_publ_contact_author_phone '86 20 33381880'
_publ_contact_author_fax    '86 20 33381880'
_publ_contact_author_email  'dh@scnu.edu.cn'
_publ_requested_joiurnal   'Chem. Mater.'
_publ_requested_coeditor_name ?
_publ_contact_letter
;
Dear Sir or Madam:
Please consider this CIF as supplmentary data for a manuscript
submitted to 'Chem. Mater. '.

Hong Deng
;
#=================================================================

# 2. PROCESSING SUMMARY (IUCr Office Use Only)

_journal_date_recd_electronic     ?

_journal_date_to_coeditor         ?
_journal_date_from_coeditor       ?
_journal_date_accepted            ?

_journal_date_printers_first      ?
_journal_date_printers_final      ?
_journal_date_proofs_out          ?
_journal_date_proofs_in           ?

_journal_coeditor_name            ?
_journal_coeditor_code            ?
_journal_coeditor_notes
 ?

_journal_techeditor_code          ?
_journal_techeditor_notes
 ?

_journal_coden_ASTM               ?
_journal_name_full                ?
_journal_year                     ?
_journal_volume                   ?
_journal_issue                    ?
_journal_page_first               ?
_journal_page_last                ?

_journal_suppl_publ_number        ?
_journal_suppl_publ_pages         ?

#=======================================================

# 3. TITLE AND AUTHOR LIST

_publ_section_title
;
?
;

loop_
 _publ_author_name
 _publ_author_address
 'Shihe Yang'
; School of Chemistry and Environment 
South China Normal University
Guangzhou 510006
P.R. China
;
 
#============================================================      
 
_audit_creation_method            SHELXL-97 
_chemical_name_systematic 
; 
 ? 
; 
_chemical_name_common             ? 
_chemical_melting_point           ? 
_chemical_formula_moiety          'C24 H19 N3 O14 Pr2, 3(H2 O)' 
_chemical_formula_sum 
 'C24 H25 N3 O17 Pr2' 
_chemical_formula_weight          909.29 
 
loop_ 
 _atom_type_symbol 
 _atom_type_description 
 _atom_type_scat_dispersion_real 
 _atom_type_scat_dispersion_imag 
 _atom_type_scat_source 
 'C'  'C'   0.0033   0.0016 
 'International Tables Vol C Tables 4.2.6.8 and 6.1.1.4' 
 'H'  'H'   0.0000   0.0000 
 'International Tables Vol C Tables 4.2.6.8 and 6.1.1.4' 
 'N'  'N'   0.0061   0.0033 
 'International Tables Vol C Tables 4.2.6.8 and 6.1.1.4' 
 'O'  'O'   0.0106   0.0060 
 'International Tables Vol C Tables 4.2.6.8 and 6.1.1.4' 
 'Pr'  'Pr'  -0.2180   2.8214 
 'International Tables Vol C Tables 4.2.6.8 and 6.1.1.4' 
 
_symmetry_cell_setting            triclinic 
_symmetry_space_group_name_H-M    P-1 
 
loop_ 
 _symmetry_equiv_pos_as_xyz 
 'x, y, z' 
 '-x, -y, -z' 
 
_cell_length_a                    8.8797(2) 
_cell_length_b                    10.4305(2) 
_cell_length_c                    16.8737(3) 
_cell_angle_alpha                 84.3830(10) 
_cell_angle_beta                  79.4540(10) 
_cell_angle_gamma                 68.2650(10) 
_cell_volume                      1426.43(5) 
_cell_formula_units_Z             2 
_cell_measurement_temperature     293(2) 
_cell_measurement_reflns_used     4512 
_cell_measurement_theta_min       1.26 
_cell_measurement_theta_max       28.00 
 
_exptl_crystal_description        block
_exptl_crystal_colour             colorless 
_exptl_crystal_size_max           0.25 
_exptl_crystal_size_mid           0.23 
_exptl_crystal_size_min           0.22 
_exptl_crystal_density_meas       ? 
_exptl_crystal_density_diffrn     2.117 
_exptl_crystal_density_method     'not measured' 
_exptl_crystal_F_000              888 
_exptl_absorpt_coefficient_mu     3.464 
_exptl_absorpt_correction_type    multi-scan 
_exptl_absorpt_correction_T_min   0.4340 
_exptl_absorpt_correction_T_max   0.4692 
_exptl_absorpt_process_details    SADABS 
 
_exptl_special_details 
; 
 ? 
; 
 
_diffrn_ambient_temperature       293(2) 
_diffrn_radiation_wavelength      0.71073 
_diffrn_radiation_type            MoK\a 
_diffrn_radiation_source          'fine-focus sealed tube' 
_diffrn_radiation_monochromator   graphite 
_diffrn_measurement_device_type   
'Bruker AXS SMART APEX CCD diffractometer'  
_diffrn_measurement_method        '\w scans' 
_diffrn_detector_area_resol_mean  ? 
_diffrn_standards_number          0 
_diffrn_standards_interval_count  . 
_diffrn_standards_interval_time   . 
_diffrn_standards_decay_%         ? 
_diffrn_reflns_number             16362 
_diffrn_reflns_av_R_equivalents   0.0388 
_diffrn_reflns_av_sigmaI/netI     0.0386 
_diffrn_reflns_limit_h_min        -10 
_diffrn_reflns_limit_h_max        10 
_diffrn_reflns_limit_k_min        -12 
_diffrn_reflns_limit_k_max        12 
_diffrn_reflns_limit_l_min        -20 
_diffrn_reflns_limit_l_max        20 
_diffrn_reflns_theta_min          1.23 
_diffrn_reflns_theta_max          25.20 
_reflns_number_total              5120 
_reflns_number_gt                 4444 
_reflns_threshold_expression      >2sigma(I) 
 
_computing_data_collection      'Bruker SMART'
_computing_cell_refinement      'Bruker SMART'
_computing_data_reduction       'Bruker SAINT'
_computing_structure_solution   'Bruker SHELXTL'
_computing_structure_refinement 'Bruker SHELXTL'
_computing_molecular_graphics   'Bruker SHELXTL'
_computing_publication_material 'Bruker SHELXTL'
 
_refine_special_details 
; 
 Refinement of F^2^ against ALL reflections.  The weighted R-factor wR and 
 goodness of fit S are based on F^2^, conventional R-factors R are based 
 on F, with F set to zero for negative F^2^. The threshold expression of 
 F^2^ > 2sigma(F^2^) is used only for calculating R-factors(gt) etc. and is 
 not relevant to the choice of reflections for refinement.  R-factors based 
 on F^2^ are statistically about twice as large as those based on F, and R- 
 factors based on ALL data will be even larger. 
; 
 
_refine_ls_structure_factor_coef  Fsqd  
_refine_ls_matrix_type            full 
_refine_ls_weighting_scheme       calc  
_refine_ls_weighting_details 
 'calc w=1/[\s^2^(Fo^2^)+(0.0791P)^2^+6.2599P] where P=(Fo^2^+2Fc^2^)/3' 
_atom_sites_solution_primary      direct 
_atom_sites_solution_secondary    difmap 
_atom_sites_solution_hydrogens    geom 
_refine_ls_hydrogen_treatment     constr
_refine_ls_extinction_method      none 
_refine_ls_extinction_coef        ? 
_refine_ls_number_reflns          5120 
_refine_ls_number_parameters      415 
_refine_ls_number_restraints      19 
_refine_ls_R_factor_all           0.0491 
_refine_ls_R_factor_gt            0.0424 
_refine_ls_wR_factor_ref          0.1224 
_refine_ls_wR_factor_gt           0.1169 
_refine_ls_goodness_of_fit_ref    1.022 
_refine_ls_restrained_S_all       1.023 
_refine_ls_shift/su_max           0.000 
_refine_ls_shift/su_mean          0.000 
 
loop_ 
 _atom_site_label 
 _atom_site_type_symbol 
 _atom_site_fract_x 
 _atom_site_fract_y 
 _atom_site_fract_z 
 _atom_site_U_iso_or_equiv 
 _atom_site_adp_type 
 _atom_site_occupancy 
 _atom_site_symmetry_multiplicity 
 _atom_site_calc_flag 
 _atom_site_refinement_flags 
 _atom_site_disorder_assembly 
 _atom_site_disorder_group 
Pr1 Pr 0.12120(4) 0.21951(3) 0.21598(2) 0.01523(13) Uani 1 1 d . . . 
Pr2 Pr 0.50487(4) 0.29493(3) 0.29647(2) 0.01619(13) Uani 1 1 d . . . 
C1 C -0.1268(8) 0.0703(7) 0.3501(4) 0.0198(14) Uani 1 1 d . . . 
C2 C -0.0693(8) -0.0450(7) 0.4116(4) 0.0202(14) Uani 1 1 d . . . 
C3 C -0.1827(8) -0.0681(7) 0.4733(4) 0.0213(14) Uani 1 1 d . . . 
H3 H -0.2942 -0.0180 0.4748 0.026 Uiso 1 1 calc R . . 
C4 C -0.1279(8) -0.1677(7) 0.5337(4) 0.0203(14) Uani 1 1 d . . . 
C5 C 0.0388(8) -0.2435(7) 0.5308(4) 0.0212(14) Uani 1 1 d . . . 
H5 H 0.0749 -0.3098 0.5711 0.025 Uiso 1 1 calc R . . 
C6 C 0.1509(8) -0.2202(7) 0.4681(4) 0.0201(14) Uani 1 1 d . . . 
C7 C 0.0967(9) -0.1233(7) 0.4076(4) 0.0238(15) Uani 1 1 d . . . 
H7 H 0.1716 -0.1106 0.3642 0.029 Uiso 1 1 calc R . . 
C8 C -0.2494(8) -0.1961(7) 0.5997(4) 0.0190(14) Uani 1 1 d . . . 
C9 C 0.4495(8) 0.0050(7) 0.2393(4) 0.0181(14) Uani 1 1 d . . . 
C10 C 0.6071(8) -0.1152(7) 0.2426(4) 0.0198(14) Uani 1 1 d . . . 
C11 C 0.6017(8) -0.2466(7) 0.2591(4) 0.0206(14) Uani 1 1 d . . . 
H11 H 0.5018 -0.2597 0.2697 0.025 Uiso 1 1 calc R . . 
C12 C 0.7481(8) -0.3578(7) 0.2593(4) 0.0219(15) Uani 1 1 d . . . 
C13 C 0.8984(8) -0.3390(7) 0.2455(5) 0.0265(16) Uani 1 1 d . . . 
H13 H 0.9952 -0.4144 0.2480 0.032 Uiso 1 1 calc R . . 
C14 C 0.9035(9) -0.2070(7) 0.2277(5) 0.0286(17) Uani 1 1 d . . . 
C15 C 0.7567(9) -0.0956(7) 0.2255(4) 0.0238(15) Uani 1 1 d . . . 
H15 H 0.7586 -0.0074 0.2125 0.029 Uiso 1 1 calc R . . 
C16 C 0.7499(8) -0.5053(7) 0.2781(4) 0.0204(14) Uani 1 1 d . . . 
C17 C 0.2834(8) 0.4602(7) 0.1442(4) 0.0250(16) Uani 1 1 d . . . 
C18 C 0.3136(8) 0.5641(7) 0.0823(4) 0.0186(14) Uani 1 1 d . . . 
C19 C 0.2428(8) 0.5936(7) 0.0131(4) 0.0178(13) Uani 1 1 d . . . 
H19 H 0.1732 0.5501 0.0042 0.021 Uiso 1 1 calc R . . 
C20 C 0.2777(8) 0.6896(7) -0.0430(4) 0.0192(14) Uani 1 1 d . . . 
C21 C 0.3786(8) 0.7557(7) -0.0298(4) 0.0207(14) Uani 1 1 d . . . 
H21 H 0.4032 0.8174 -0.0689 0.025 Uiso 1 1 calc R . . 
C22 C 0.4443(8) 0.7312(7) 0.0411(4) 0.0200(14) Uani 1 1 d . . . 
C23 C 0.4135(8) 0.6338(7) 0.0973(4) 0.0206(14) Uani 1 1 d . . . 
H23 H 0.4589 0.6147 0.1445 0.025 Uiso 1 1 calc R . . 
C24 C 0.2051(8) 0.7230(6) -0.1198(4) 0.0179(14) Uani 1 1 d . . . 
N1 N 0.3209(7) -0.2988(7) 0.4650(4) 0.0291(14) Uani 1 1 d . . . 
H1A H 0.3538 -0.3606 0.5020 0.035 Uiso 1 1 calc R . . 
H1B H 0.3910 -0.2846 0.4261 0.035 Uiso 1 1 calc R . . 
N2 N 1.0524(8) -0.1868(8) 0.2068(6) 0.054(2) Uani 1 1 d . . . 
H2A H 1.0536 -0.1057 0.1926 0.065 Uiso 1 1 calc R . . 
H2B H 1.1433 -0.2555 0.2081 0.065 Uiso 1 1 calc R . . 
N3 N 0.5338(8) 0.8095(7) 0.0571(4) 0.0322(15) Uani 1 1 d . . . 
H3A H 0.5479 0.8724 0.0230 0.039 Uiso 1 1 calc R . . 
H3B H 0.5746 0.7944 0.1011 0.039 Uiso 1 1 calc R . . 
O1 O -0.2736(6) 0.1491(5) 0.3620(3) 0.0262(11) Uani 1 1 d . . . 
O2 O -0.0217(6) 0.0821(5) 0.2911(3) 0.0209(10) Uani 1 1 d . . . 
O3 O -0.3997(6) -0.1483(5) 0.5948(3) 0.0270(11) Uani 1 1 d . . . 
O4 O -0.1985(6) -0.2737(5) 0.6608(3) 0.0209(10) Uani 1 1 d . . . 
O5 O 0.3180(6) -0.0150(5) 0.2522(3) 0.0271(11) Uani 1 1 d . . . 
O6 O 0.4557(6) 0.1249(5) 0.2199(3) 0.0217(10) Uani 1 1 d . . . 
O7 O 0.6147(6) -0.5203(5) 0.2929(4) 0.0331(13) Uani 1 1 d . . . 
O8 O 0.8860(6) -0.5995(5) 0.2773(3) 0.0282(11) Uani 1 1 d . . . 
O9 O 0.3317(7) 0.4502(6) 0.2108(3) 0.0321(12) Uani 1 1 d . . . 
O10 O 0.2082(7) 0.3868(5) 0.1273(3) 0.0326(13) Uani 1 1 d . . . 
O11 O 0.0641(6) 0.7223(6) -0.1169(3) 0.0334(13) Uani 1 1 d . . . 
O12 O 0.2886(6) 0.7531(5) -0.1819(3) 0.0301(12) Uani 1 1 d . . . 
O1W O 0.2525(7) 0.0722(6) 0.0928(3) 0.0403(14) Uani 1 1 d D . . 
H1W H 0.3134 -0.0083 0.0983 0.060 Uiso 1 1 d RD . . 
H2W H 0.1881 0.0780 0.0621 0.060 Uiso 1 1 d RD . . 
O2W O 0.3769(8) 0.4358(6) 0.4172(4) 0.0468(16) Uani 1 1 d D . . 
H3W H 0.3759 0.5148 0.4086 0.070 Uiso 1 1 d RD . . 
H4W H 0.2883 0.4363 0.4422 0.070 Uiso 1 1 d RD . . 
O3W O 0.1514(14) 0.4170(9) 0.5517(5) 0.099(3) Uani 1 1 d D . . 
H5W H 0.0560 0.4352 0.5783 0.149 Uiso 1 1 d RD . . 
H6W H 0.1878 0.4748 0.5642 0.149 Uiso 1 1 d RD . . 
O4W O 0.568(2) 0.825(2) 0.4357(9) 0.223(11) Uani 1 1 d D . . 
H7W H 0.5211 0.8138 0.4823 0.334 Uiso 1 1 d RD . . 
H8W H 0.4954 0.8695 0.4082 0.334 Uiso 1 1 d RD . . 
O5W O 0.9123(11) 0.9083(13) 0.0318(5) 0.116(4) Uani 1 1 d D . . 
H9W H 0.8884 0.8383 0.0482 0.174 Uiso 1 1 d RD . . 
H10W H 0.9910 0.9039 0.0544 0.174 Uiso 1 1 d RD . . 
 
loop_ 
 _atom_site_aniso_label 
 _atom_site_aniso_U_11 
 _atom_site_aniso_U_22 
 _atom_site_aniso_U_33 
 _atom_site_aniso_U_23 
 _atom_site_aniso_U_13 
 _atom_site_aniso_U_12 
Pr1 0.0143(2) 0.0150(2) 0.0168(2) 0.00524(14) -0.00385(14) -0.00645(15) 
Pr2 0.0167(2) 0.0175(2) 0.0161(2) 0.00658(14) -0.00566(15) -0.00843(16) 
C1 0.014(3) 0.024(3) 0.020(3) 0.003(3) -0.002(3) -0.007(3) 
C2 0.021(3) 0.018(3) 0.023(4) 0.002(3) -0.004(3) -0.008(3) 
C3 0.016(3) 0.020(3) 0.027(4) 0.007(3) -0.002(3) -0.007(3) 
C4 0.021(4) 0.020(3) 0.020(3) 0.006(3) -0.002(3) -0.011(3) 
C5 0.026(4) 0.018(3) 0.020(3) 0.005(3) -0.005(3) -0.008(3) 
C6 0.014(3) 0.021(3) 0.025(4) -0.004(3) -0.002(3) -0.007(3) 
C7 0.024(4) 0.020(3) 0.026(4) 0.003(3) -0.003(3) -0.008(3) 
C8 0.021(4) 0.019(3) 0.018(3) 0.006(3) -0.004(3) -0.010(3) 
C9 0.018(3) 0.023(3) 0.010(3) 0.001(3) 0.000(2) -0.005(3) 
C10 0.022(4) 0.018(3) 0.018(3) -0.002(3) -0.003(3) -0.005(3) 
C11 0.018(3) 0.024(4) 0.023(4) -0.001(3) -0.004(3) -0.011(3) 
C12 0.019(3) 0.015(3) 0.033(4) -0.002(3) -0.008(3) -0.005(3) 
C13 0.011(3) 0.021(4) 0.044(4) -0.011(3) 0.000(3) 0.000(3) 
C14 0.019(4) 0.020(4) 0.048(5) -0.013(3) 0.005(3) -0.010(3) 
C15 0.025(4) 0.020(3) 0.025(4) -0.001(3) 0.005(3) -0.010(3) 
C16 0.020(4) 0.014(3) 0.027(4) 0.004(3) -0.010(3) -0.003(3) 
C17 0.018(4) 0.024(4) 0.028(4) 0.011(3) -0.002(3) -0.006(3) 
C18 0.015(3) 0.021(3) 0.019(3) 0.006(3) -0.005(3) -0.006(3) 
C19 0.016(3) 0.018(3) 0.019(3) 0.002(3) -0.003(3) -0.007(3) 
C20 0.020(3) 0.017(3) 0.020(3) 0.005(3) -0.004(3) -0.006(3) 
C21 0.021(4) 0.019(3) 0.020(3) 0.009(3) -0.003(3) -0.007(3) 
C22 0.017(3) 0.021(3) 0.022(3) -0.001(3) -0.001(3) -0.009(3) 
C23 0.021(3) 0.024(4) 0.014(3) 0.004(3) -0.005(3) -0.005(3) 
C24 0.022(4) 0.016(3) 0.014(3) 0.002(2) 0.000(3) -0.007(3) 
N1 0.018(3) 0.037(4) 0.025(3) 0.006(3) -0.004(3) -0.003(3) 
N2 0.019(3) 0.032(4) 0.110(7) -0.025(4) 0.018(4) -0.015(3) 
N3 0.043(4) 0.044(4) 0.025(3) 0.002(3) -0.008(3) -0.033(3) 
O1 0.018(3) 0.030(3) 0.029(3) 0.011(2) -0.007(2) -0.008(2) 
O2 0.021(2) 0.020(2) 0.019(2) 0.0063(19) -0.0014(19) -0.007(2) 
O3 0.018(3) 0.037(3) 0.025(3) 0.013(2) -0.006(2) -0.011(2) 
O4 0.021(2) 0.021(2) 0.019(2) 0.0001(19) -0.0028(19) -0.006(2) 
O5 0.019(3) 0.020(2) 0.040(3) 0.010(2) -0.007(2) -0.007(2) 
O6 0.027(3) 0.013(2) 0.025(3) 0.0051(19) -0.006(2) -0.007(2) 
O7 0.022(3) 0.016(2) 0.060(4) 0.001(2) 0.000(2) -0.008(2) 
O8 0.022(3) 0.014(2) 0.043(3) 0.003(2) -0.007(2) -0.001(2) 
O9 0.030(3) 0.035(3) 0.027(3) 0.014(2) -0.010(2) -0.007(2) 
O10 0.034(3) 0.031(3) 0.039(3) 0.017(2) -0.010(2) -0.021(2) 
O11 0.023(3) 0.059(4) 0.024(3) 0.015(3) -0.010(2) -0.022(3) 
O12 0.029(3) 0.037(3) 0.027(3) 0.003(2) -0.003(2) -0.017(2) 
O1W 0.044(4) 0.033(3) 0.039(3) -0.014(3) -0.011(3) -0.003(3) 
O2W 0.064(4) 0.035(3) 0.043(4) -0.014(3) 0.016(3) -0.028(3) 
O3W 0.168(10) 0.084(7) 0.070(6) -0.006(5) -0.008(6) -0.077(7) 
O4W 0.228(19) 0.42(3) 0.112(11) -0.037(15) 0.003(12) -0.23(2) 
O5W 0.070(6) 0.180(11) 0.048(5) -0.027(6) -0.021(4) 0.023(7) 
 
_geom_special_details 
; 
 All esds (except the esd in the dihedral angle between two l.s. planes) 
 are estimated using the full covariance matrix.  The cell esds are taken 
 into account individually in the estimation of esds in distances, angles 
 and torsion angles; correlations between esds in cell parameters are only 
 used when they are defined by crystal symmetry.  An approximate (isotropic) 
 treatment of cell esds is used for estimating esds involving l.s. planes. 
; 
 
loop_ 
 _geom_bond_atom_site_label_1 
 _geom_bond_atom_site_label_2 
 _geom_bond_distance 
 _geom_bond_site_symmetry_2 
 _geom_bond_publ_flag 
Pr1 O8 2.381(5) 1_465 ? 
Pr1 O2 2.382(4) . ? 
Pr1 O11 2.437(5) 2_565 ? 
Pr1 O10 2.438(5) . ? 
Pr1 O4 2.480(5) 2_556 ? 
Pr1 O5 2.519(5) . ? 
Pr1 O1W 2.541(5) . ? 
Pr1 O6 2.773(5) . ? 
Pr2 O12 2.358(5) 2_665 ? 
Pr2 O9 2.364(5) . ? 
Pr2 O1 2.378(5) 1_655 ? 
Pr2 O7 2.453(5) 1_565 ? 
Pr2 O2W 2.470(6) . ? 
Pr2 O6 2.497(5) . ? 
Pr2 O3 2.541(5) 2_556 ? 
Pr2 O4 2.769(5) 2_556 ? 
Pr2 C8 3.034(6) 2_556 ? 
C1 O1 1.248(8) . ? 
C1 O2 1.264(8) . ? 
C1 C2 1.510(9) . ? 
C2 C3 1.380(9) . ? 
C2 C7 1.388(10) . ? 
C3 C4 1.397(9) . ? 
C3 H3 0.9300 . ? 
C4 C5 1.390(10) . ? 
C4 C8 1.492(9) . ? 
C5 C6 1.383(9) . ? 
C5 H5 0.9300 . ? 
C6 C7 1.383(10) . ? 
C6 N1 1.421(9) . ? 
C7 H7 0.9300 . ? 
C8 O3 1.256(8) . ? 
C8 O4 1.289(8) . ? 
C8 Pr2 3.034(6) 2_556 ? 
C9 O5 1.238(8) . ? 
C9 O6 1.279(8) . ? 
C9 C10 1.500(9) . ? 
C10 C11 1.388(9) . ? 
C10 C15 1.393(10) . ? 
C11 C12 1.386(10) . ? 
C11 H11 0.9300 . ? 
C12 C13 1.394(9) . ? 
C12 C16 1.535(9) . ? 
C13 C14 1.396(10) . ? 
C13 H13 0.9300 . ? 
C14 C15 1.392(10) . ? 
C14 N2 1.393(9) . ? 
C15 H15 0.9300 . ? 
C16 O8 1.241(8) . ? 
C16 O7 1.245(8) . ? 
C17 O9 1.256(9) . ? 
C17 O10 1.266(9) . ? 
C17 C18 1.492(9) . ? 
C18 C19 1.382(9) . ? 
C18 C23 1.405(9) . ? 
C19 C20 1.390(9) . ? 
C19 H19 0.9300 . ? 
C20 C21 1.373(9) . ? 
C20 C24 1.507(9) . ? 
C21 C22 1.387(10) . ? 
C21 H21 0.9300 . ? 
C22 C23 1.388(9) . ? 
C22 N3 1.405(9) . ? 
C23 H23 0.9300 . ? 
C24 O11 1.246(8) . ? 
C24 O12 1.253(8) . ? 
N1 H1A 0.8600 . ? 
N1 H1B 0.8600 . ? 
N2 H2A 0.8600 . ? 
N2 H2B 0.8600 . ? 
N3 H3A 0.8600 . ? 
N3 H3B 0.8600 . ? 
O1 Pr2 2.378(5) 1_455 ? 
O3 Pr2 2.541(5) 2_556 ? 
O4 Pr1 2.480(5) 2_556 ? 
O4 Pr2 2.769(5) 2_556 ? 
O7 Pr2 2.453(5) 1_545 ? 
O8 Pr1 2.381(5) 1_645 ? 
O11 Pr1 2.437(5) 2_565 ? 
O12 Pr2 2.358(5) 2_665 ? 
O1W H1W 0.8201 . ? 
O1W H2W 0.8209 . ? 
O2W H3W 0.8204 . ? 
O2W H4W 0.8209 . ? 
O3W H5W 0.8442 . ? 
O3W H6W 0.8405 . ? 
O4W H7W 0.8409 . ? 
O4W H8W 0.8342 . ? 
O5W H9W 0.8418 . ? 
O5W H10W 0.8403 . ? 
 
loop_ 
 _geom_angle_atom_site_label_1 
 _geom_angle_atom_site_label_2 
 _geom_angle_atom_site_label_3 
 _geom_angle 
 _geom_angle_site_symmetry_1 
 _geom_angle_site_symmetry_3 
 _geom_angle_publ_flag 
O8 Pr1 O2 81.48(16) 1_465 . ? 
O8 Pr1 O11 76.92(19) 1_465 2_565 ? 
O2 Pr1 O11 89.95(16) . 2_565 ? 
O8 Pr1 O10 90.56(18) 1_465 . ? 
O2 Pr1 O10 166.82(17) . . ? 
O11 Pr1 O10 77.97(17) 2_565 . ? 
O8 Pr1 O4 74.25(17) 1_465 2_556 ? 
O2 Pr1 O4 92.17(15) . 2_556 ? 
O11 Pr1 O4 150.43(18) 2_565 2_556 ? 
O10 Pr1 O4 95.77(17) . 2_556 ? 
O8 Pr1 O5 139.53(17) 1_465 . ? 
O2 Pr1 O5 68.91(15) . . ? 
O11 Pr1 O5 128.00(19) 2_565 . ? 
O10 Pr1 O5 122.87(17) . . ? 
O4 Pr1 O5 79.80(16) 2_556 . ? 
O8 Pr1 O1W 145.88(19) 1_465 . ? 
O2 Pr1 O1W 99.07(18) . . ? 
O11 Pr1 O1W 68.98(19) 2_565 . ? 
O10 Pr1 O1W 81.64(19) . . ? 
O4 Pr1 O1W 139.36(17) 2_556 . ? 
O5 Pr1 O1W 68.47(18) . . ? 
O8 Pr1 O6 135.52(16) 1_465 . ? 
O2 Pr1 O6 115.49(14) . . ? 
O11 Pr1 O6 138.88(16) 2_565 . ? 
O10 Pr1 O6 77.51(15) . . ? 
O4 Pr1 O6 64.78(15) 2_556 . ? 
O5 Pr1 O6 48.86(14) . . ? 
O1W Pr1 O6 75.18(17) . . ? 
O12 Pr2 O9 86.20(18) 2_665 . ? 
O12 Pr2 O1 82.38(17) 2_665 1_655 ? 
O9 Pr2 O1 167.18(17) . 1_655 ? 
O12 Pr2 O7 76.58(18) 2_665 1_565 ? 
O9 Pr2 O7 83.34(19) . 1_565 ? 
O1 Pr2 O7 88.35(17) 1_655 1_565 ? 
O12 Pr2 O2W 146.18(18) 2_665 . ? 
O9 Pr2 O2W 94.9(2) . . ? 
O1 Pr2 O2W 91.4(2) 1_655 . ? 
O7 Pr2 O2W 70.01(19) 1_565 . ? 
O12 Pr2 O6 74.45(16) 2_665 . ? 
O9 Pr2 O6 80.83(17) . . ? 
O1 Pr2 O6 101.54(17) 1_655 . ? 
O7 Pr2 O6 147.71(17) 1_565 . ? 
O2W Pr2 O6 139.16(18) . . ? 
O12 Pr2 O3 134.65(18) 2_665 2_556 ? 
O9 Pr2 O3 121.55(17) . 2_556 ? 
O1 Pr2 O3 71.05(15) 1_655 2_556 ? 
O7 Pr2 O3 136.15(19) 1_565 2_556 ? 
O2W Pr2 O3 72.23(18) . 2_556 ? 
O6 Pr2 O3 75.76(16) . 2_556 ? 
O12 Pr2 O4 136.13(16) 2_665 2_556 ? 
O9 Pr2 O4 72.75(16) . 2_556 ? 
O1 Pr2 O4 119.77(14) 1_655 2_556 ? 
O7 Pr2 O4 135.56(15) 1_565 2_556 ? 
O2W Pr2 O4 75.24(17) . 2_556 ? 
O6 Pr2 O4 64.64(15) . 2_556 ? 
O3 Pr2 O4 48.81(14) 2_556 2_556 ? 
O12 Pr2 C8 144.32(18) 2_665 2_556 ? 
O9 Pr2 C8 97.67(18) . 2_556 ? 
O1 Pr2 C8 95.01(17) 1_655 2_556 ? 
O7 Pr2 C8 139.07(19) 1_565 2_556 ? 
O2W Pr2 C8 69.14(19) . 2_556 ? 
O6 Pr2 C8 71.25(17) . 2_556 ? 
O3 Pr2 C8 24.01(17) 2_556 2_556 ? 
O4 Pr2 C8 25.14(16) 2_556 2_556 ? 
O1 C1 O2 124.6(6) . . ? 
O1 C1 C2 117.8(6) . . ? 
O2 C1 C2 117.6(6) . . ? 
C3 C2 C7 120.5(6) . . ? 
C3 C2 C1 119.3(6) . . ? 
C7 C2 C1 120.2(6) . . ? 
C2 C3 C4 119.2(6) . . ? 
C2 C3 H3 120.4 . . ? 
C4 C3 H3 120.4 . . ? 
C5 C4 C3 120.3(6) . . ? 
C5 C4 C8 120.0(6) . . ? 
C3 C4 C8 119.7(6) . . ? 
C6 C5 C4 119.9(6) . . ? 
C6 C5 H5 120.1 . . ? 
C4 C5 H5 120.1 . . ? 
C5 C6 C7 119.9(6) . . ? 
C5 C6 N1 119.7(6) . . ? 
C7 C6 N1 120.3(6) . . ? 
C6 C7 C2 120.1(6) . . ? 
C6 C7 H7 119.9 . . ? 
C2 C7 H7 119.9 . . ? 
O3 C8 O4 120.0(6) . . ? 
O3 C8 C4 120.5(6) . . ? 
O4 C8 C4 119.5(6) . . ? 
O3 C8 Pr2 55.4(3) . 2_556 ? 
O4 C8 Pr2 65.8(3) . 2_556 ? 
C4 C8 Pr2 166.2(5) . 2_556 ? 
O5 C9 O6 121.8(6) . . ? 
O5 C9 C10 119.3(6) . . ? 
O6 C9 C10 118.8(6) . . ? 
C11 C10 C15 120.7(6) . . ? 
C11 C10 C9 119.0(6) . . ? 
C15 C10 C9 120.2(6) . . ? 
C12 C11 C10 118.7(6) . . ? 
C12 C11 H11 120.6 . . ? 
C10 C11 H11 120.6 . . ? 
C11 C12 C13 121.1(6) . . ? 
C11 C12 C16 121.1(6) . . ? 
C13 C12 C16 117.7(6) . . ? 
C12 C13 C14 119.9(7) . . ? 
C12 C13 H13 120.0 . . ? 
C14 C13 H13 120.0 . . ? 
C15 C14 N2 119.8(7) . . ? 
C15 C14 C13 118.9(6) . . ? 
N2 C14 C13 121.1(7) . . ? 
C14 C15 C10 120.5(6) . . ? 
C14 C15 H15 119.8 . . ? 
C10 C15 H15 119.8 . . ? 
O8 C16 O7 125.6(6) . . ? 
O8 C16 C12 117.3(6) . . ? 
O7 C16 C12 117.1(6) . . ? 
O9 C17 O10 122.8(6) . . ? 
O9 C17 C18 118.9(6) . . ? 
O10 C17 C18 118.2(6) . . ? 
C19 C18 C23 120.7(6) . . ? 
C19 C18 C17 121.2(6) . . ? 
C23 C18 C17 118.0(6) . . ? 
C18 C19 C20 118.6(6) . . ? 
C18 C19 H19 120.7 . . ? 
C20 C19 H19 120.7 . . ? 
C21 C20 C19 121.1(6) . . ? 
C21 C20 C24 118.7(5) . . ? 
C19 C20 C24 120.2(6) . . ? 
C20 C21 C22 120.7(6) . . ? 
C20 C21 H21 119.7 . . ? 
C22 C21 H21 119.7 . . ? 
C21 C22 C23 119.2(6) . . ? 
C21 C22 N3 119.9(6) . . ? 
C23 C22 N3 120.8(6) . . ? 
C22 C23 C18 119.7(6) . . ? 
C22 C23 H23 120.2 . . ? 
C18 C23 H23 120.2 . . ? 
O11 C24 O12 124.3(6) . . ? 
O11 C24 C20 117.8(5) . . ? 
O12 C24 C20 117.9(6) . . ? 
C6 N1 H1A 120.0 . . ? 
C6 N1 H1B 120.0 . . ? 
H1A N1 H1B 120.0 . . ? 
C14 N2 H2A 120.0 . . ? 
C14 N2 H2B 120.0 . . ? 
H2A N2 H2B 120.0 . . ? 
C22 N3 H3A 120.0 . . ? 
C22 N3 H3B 120.0 . . ? 
H3A N3 H3B 120.0 . . ? 
C1 O1 Pr2 143.7(4) . 1_455 ? 
C1 O2 Pr1 148.7(4) . . ? 
C8 O3 Pr2 100.6(4) . 2_556 ? 
C8 O4 Pr1 130.6(4) . 2_556 ? 
C8 O4 Pr2 89.0(4) . 2_556 ? 
Pr1 O4 Pr2 107.55(16) 2_556 2_556 ? 
C9 O5 Pr1 101.1(4) . . ? 
C9 O6 Pr2 132.1(4) . . ? 
C9 O6 Pr1 88.0(4) . . ? 
Pr2 O6 Pr1 106.94(16) . . ? 
C16 O7 Pr2 138.7(4) . 1_545 ? 
C16 O8 Pr1 154.0(5) . 1_645 ? 
C17 O9 Pr2 143.0(5) . . ? 
C17 O10 Pr1 127.3(5) . . ? 
C24 O11 Pr1 132.9(4) . 2_565 ? 
C24 O12 Pr2 155.2(5) . 2_665 ? 
Pr1 O1W H1W 119.5 . . ? 
Pr1 O1W H2W 113.7 . . ? 
H1W O1W H2W 110.6 . . ? 
Pr2 O2W H3W 111.5 . . ? 
Pr2 O2W H4W 120.0 . . ? 
H3W O2W H4W 110.5 . . ? 
H5W O3W H6W 106.9 . . ? 
H7W O4W H8W 107.2 . . ? 
H9W O5W H10W 106.7 . . ? 
 
_diffrn_measured_fraction_theta_max    0.995 
_diffrn_reflns_theta_full              25.20 
_diffrn_measured_fraction_theta_full   0.995 
_refine_diff_density_max    1.778 
_refine_diff_density_min   -1.227 
_refine_diff_density_rms    0.216 

data_Pr2

#====================================================================


_audit_creation_method            SHELXL-97 
_chemical_name_systematic 
; 
 ? 
; 
_chemical_name_common             ? 
_chemical_melting_point           ? 
_chemical_formula_moiety          ? 
_chemical_formula_sum 
 'C24 H17 N5 O18 Pr2' 
_chemical_formula_weight          945.25 
 
loop_ 
 _atom_type_symbol 
 _atom_type_description 
 _atom_type_scat_dispersion_real 
 _atom_type_scat_dispersion_imag 
 _atom_type_scat_source 
 'C'  'C'   0.0033   0.0016 
 'International Tables Vol C Tables 4.2.6.8 and 6.1.1.4' 
 'H'  'H'   0.0000   0.0000 
 'International Tables Vol C Tables 4.2.6.8 and 6.1.1.4' 
 'N'  'N'   0.0061   0.0033 
 'International Tables Vol C Tables 4.2.6.8 and 6.1.1.4' 
 'O'  'O'   0.0106   0.0060 
 'International Tables Vol C Tables 4.2.6.8 and 6.1.1.4' 
 'Pr'  'Pr'  -0.2180   2.8214 
 'International Tables Vol C Tables 4.2.6.8 and 6.1.1.4' 
 
_symmetry_cell_setting            orthorhombic 
_symmetry_space_group_name_H-M    Pnma 
 
loop_ 
 _symmetry_equiv_pos_as_xyz 
 'x, y, z' 
 '-x+1/2, -y, z+1/2' 
 '-x, y+1/2, -z' 
 'x+1/2, -y+1/2, -z+1/2' 
 '-x, -y, -z' 
 'x-1/2, y, -z-1/2' 
 'x, -y-1/2, z' 
 '-x-1/2, y-1/2, z-1/2' 
 
_cell_length_a                    8.5785(4) 
_cell_length_b                    31.9322(15) 
_cell_length_c                    13.8236(7) 
_cell_angle_alpha                 90.00 
_cell_angle_beta                  90.00 
_cell_angle_gamma                 90.00 
_cell_volume                      3786.7(3) 
_cell_formula_units_Z             4 
_cell_measurement_temperature     293(2) 
_cell_measurement_reflns_used     2650 
_cell_measurement_theta_min       1.36 
_cell_measurement_theta_max       28.00 
 
_exptl_crystal_description        block 
_exptl_crystal_colour             colorless 
_exptl_crystal_size_max           0.15 
_exptl_crystal_size_mid           0.13 
_exptl_crystal_size_min           0.12 
_exptl_crystal_density_meas       ? 
_exptl_crystal_density_diffrn     1.658 
_exptl_crystal_density_method     'not measured' 
_exptl_crystal_F_000              1832 
_exptl_absorpt_coefficient_mu     2.616 
_exptl_absorpt_correction_type    multi-scan
_exptl_absorpt_correction_T_min   0.6824 
_exptl_absorpt_correction_T_max   0.7367 
_exptl_absorpt_process_details    SADABS 
 
_exptl_special_details 
; 
 ? 
; 
 
_diffrn_ambient_temperature       293(2) 
_diffrn_radiation_wavelength      0.71073 
_diffrn_radiation_type            MoK\a 
_diffrn_radiation_source          'fine-focus sealed tube' 
_diffrn_radiation_monochromator   graphite 
_diffrn_measurement_device_type   
'Bruker AXS SMART APEX CCD diffractometer'  
_diffrn_measurement_method        '\w scans' 
_diffrn_detector_area_resol_mean  ? 
_diffrn_standards_number          0 
_diffrn_standards_interval_count  . 
_diffrn_standards_interval_time   . 
_diffrn_standards_decay_%         ? 
_diffrn_reflns_number             3184 
_diffrn_reflns_av_R_equivalents   0.0000 
_diffrn_reflns_av_sigmaI/netI     0.0516 
_diffrn_reflns_limit_h_min        0 
_diffrn_reflns_limit_h_max        10 
_diffrn_reflns_limit_k_min        0 
_diffrn_reflns_limit_k_max        32 
_diffrn_reflns_limit_l_min        0 
_diffrn_reflns_limit_l_max        16 
_diffrn_reflns_theta_min          2.41 
_diffrn_reflns_theta_max          24.99 
_reflns_number_total              3184 
_reflns_number_gt                 2207 
_reflns_threshold_expression      >2sigma(I) 
 
_computing_data_collection      'Bruker SMART'
_computing_cell_refinement      'Bruker SMART'
_computing_data_reduction       'Bruker SAINT'
_computing_structure_solution   'Bruker SHELXTL'
_computing_structure_refinement 'Bruker SHELXTL'
_computing_molecular_graphics   'Bruker SHELXTL'
_computing_publication_material 'Bruker SHELXTL'
 
_refine_special_details 
; 
 Refinement of F^2^ against ALL reflections.  The weighted R-factor wR and 
 goodness of fit S are based on F^2^, conventional R-factors R are based 
 on F, with F set to zero for negative F^2^. The threshold expression of 
 F^2^ > 2sigma(F^2^) is used only for calculating R-factors(gt) etc. and is 
 not relevant to the choice of reflections for refinement.  R-factors based 
 on F^2^ are statistically about twice as large as those based on F, and R- 
 factors based on ALL data will be even larger. 
; 
 
_refine_ls_structure_factor_coef  Fsqd  
_refine_ls_matrix_type            full 
_refine_ls_weighting_scheme       calc  
_refine_ls_weighting_details 
 'calc w=1/[\s^2^(Fo^2^)+(0.0458P)^2^] where P=(Fo^2^+2Fc^2^)/3' 
_atom_sites_solution_primary      direct 
_atom_sites_solution_secondary    difmap 
_atom_sites_solution_hydrogens    geom 
_refine_ls_hydrogen_treatment     constr
_refine_ls_extinction_method      none 
_refine_ls_extinction_coef        ? 
_refine_ls_number_reflns          3184 
_refine_ls_number_parameters      227 
_refine_ls_number_restraints      0 
_refine_ls_R_factor_all           0.0545 
_refine_ls_R_factor_gt            0.0349 
_refine_ls_wR_factor_ref          0.0901 
_refine_ls_wR_factor_gt           0.0849 
_refine_ls_goodness_of_fit_ref    1.000 
_refine_ls_restrained_S_all       1.000 
_refine_ls_shift/su_max           0.001 
_refine_ls_shift/su_mean          0.000 
 
loop_ 
 _atom_site_label 
 _atom_site_type_symbol 
 _atom_site_fract_x 
 _atom_site_fract_y 
 _atom_site_fract_z 
 _atom_site_U_iso_or_equiv 
 _atom_site_adp_type 
 _atom_site_occupancy 
 _atom_site_symmetry_multiplicity 
 _atom_site_calc_flag 
 _atom_site_refinement_flags 
 _atom_site_disorder_assembly 
 _atom_site_disorder_group 
Pr1 Pr 1.07896(3) 0.603430(9) 0.20127(2) 0.02586(14) Uani 1 1 d . . . 
C1 C 0.8417(6) 0.67250(18) 0.3146(4) 0.0271(13) Uani 1 1 d . . . 
C2 C 0.9196(5) 0.71259(17) 0.3422(4) 0.0276(13) Uani 1 1 d . . . 
C3 C 0.8475(8) 0.7500 0.3207(5) 0.0277(19) Uani 1 2 d S . . 
H3 H 0.7497 0.7500 0.2916 0.033 Uiso 1 2 calc SR . . 
C4 C 1.0637(5) 0.71270(18) 0.3898(4) 0.0317(13) Uani 1 1 d . . . 
H4 H 1.1129 0.6876 0.4052 0.038 Uiso 1 1 calc R . . 
C5 C 1.1310(8) 0.7500 0.4132(5) 0.033(2) Uani 1 2 d S . . 
C6 C 0.7925(6) 0.57328(17) 0.0843(4) 0.0327(14) Uani 1 1 d . . . 
C7 C 0.6785(5) 0.55992(17) 0.0088(4) 0.0298(14) Uani 1 1 d . . . 
C8 C 0.5517(6) 0.58519(19) -0.0136(4) 0.0373(15) Uani 1 1 d . . . 
H8 H 0.5333 0.6099 0.0199 0.045 Uiso 1 1 calc R . . 
C9 C 0.4542(6) 0.57248(19) -0.0870(4) 0.0355(15) Uani 1 1 d . . . 
C10 C 0.4770(6) 0.53585(18) -0.1358(4) 0.0366(15) Uani 1 1 d . . . 
H10 H 0.4097 0.5282 -0.1855 0.044 Uiso 1 1 calc R . . 
C11 C 0.6016(5) 0.50995(17) -0.1109(4) 0.0268(13) Uani 1 1 d . . . 
C12 C 0.7024(5) 0.52253(16) -0.0402(4) 0.0267(13) Uani 1 1 d . . . 
H12 H 0.7879 0.5059 -0.0248 0.032 Uiso 1 1 calc R . . 
C13 C 0.6249(6) 0.46935(18) -0.1618(4) 0.0292(13) Uani 1 1 d . . . 
N1 N 1.0417(7) 0.6618(2) 0.0274(5) 0.0734(19) Uani 1 1 d . . . 
N2 N 1.2778(8) 0.7500 0.4665(6) 0.070(3) Uani 1 2 d S . . 
H2A H 1.3206 0.7733 0.4828 0.084 Uiso 0.50 1 calc PR . . 
H2B H 1.3216 0.7267 0.4818 0.084 Uiso 0.50 1 calc PR . . 
N3 N 0.3225(6) 0.59948(15) -0.1170(4) 0.0598(16) Uani 1 1 d . . . 
H3A H 0.3429 0.6106 -0.1746 0.090 Uiso 1 1 calc R . . 
H3B H 0.3095 0.6198 -0.0737 0.090 Uiso 1 1 calc R . . 
H3C H 0.2359 0.5842 -0.1206 0.090 Uiso 1 1 calc R . . 
O1 O 0.7526(4) 0.59505(11) 0.1571(3) 0.0395(10) Uani 1 1 d . . . 
O2 O 0.9342(4) 0.56351(13) 0.0713(3) 0.0483(12) Uani 1 1 d . . . 
O3 O 0.9198(4) 0.63846(12) 0.3200(3) 0.0360(10) Uani 1 1 d . . . 
O4 O 0.7035(4) 0.67348(12) 0.2884(3) 0.0413(11) Uani 1 1 d . . . 
O5 O 0.5200(4) 0.45799(12) -0.2214(3) 0.0440(11) Uani 1 1 d . . . 
O6 O 0.7429(4) 0.44806(12) -0.1409(3) 0.0418(10) Uani 1 1 d . . . 
O7 O 1.1466(5) 0.63437(14) 0.0317(3) 0.0594(13) Uani 1 1 d . . . 
O8 O 0.9401(4) 0.66370(15) 0.0903(4) 0.0620(14) Uani 1 1 d . . . 
O9 O 1.0463(7) 0.6887(3) -0.0386(5) 0.162(4) Uani 1 1 d . . . 
 
loop_ 
 _atom_site_aniso_label 
 _atom_site_aniso_U_11 
 _atom_site_aniso_U_22 
 _atom_site_aniso_U_33 
 _atom_site_aniso_U_23 
 _atom_site_aniso_U_13 
 _atom_site_aniso_U_12 
Pr1 0.02209(17) 0.0180(2) 0.0375(2) 0.00010(14) 0.00221(13) -0.00022(13) 
C1 0.036(3) 0.011(4) 0.034(3) 0.002(3) 0.005(3) 0.000(3) 
C2 0.023(3) 0.021(4) 0.038(3) 0.000(3) -0.002(2) 0.002(3) 
C3 0.019(4) 0.028(6) 0.037(5) 0.000 -0.010(3) 0.000 
C4 0.027(3) 0.021(4) 0.047(3) 0.007(3) 0.000(3) 0.006(3) 
C5 0.028(4) 0.026(6) 0.044(5) 0.000 -0.006(4) 0.000 
C6 0.029(3) 0.025(4) 0.045(4) 0.001(3) 0.000(3) -0.006(3) 
C7 0.022(3) 0.025(4) 0.042(4) 0.001(3) 0.000(3) -0.005(3) 
C8 0.045(4) 0.033(4) 0.034(3) -0.006(3) 0.006(3) 0.003(3) 
C9 0.031(3) 0.030(4) 0.045(4) -0.002(3) 0.003(3) 0.014(3) 
C10 0.025(3) 0.040(4) 0.045(4) -0.010(3) -0.003(3) 0.001(3) 
C11 0.017(3) 0.023(4) 0.041(3) -0.003(3) 0.006(2) 0.000(2) 
C12 0.023(3) 0.018(4) 0.039(3) -0.006(3) -0.003(2) -0.003(2) 
C13 0.024(3) 0.017(4) 0.047(4) 0.001(3) 0.006(3) -0.006(3) 
N1 0.074(5) 0.088(6) 0.058(4) 0.030(4) -0.008(4) 0.006(4) 
N2 0.044(5) 0.034(5) 0.132(8) 0.000 -0.033(5) 0.000 
N3 0.053(3) 0.063(4) 0.064(4) -0.008(3) -0.011(3) 0.034(3) 
O1 0.044(2) 0.027(3) 0.047(2) -0.007(2) 0.005(2) -0.0056(19) 
O2 0.032(2) 0.060(3) 0.054(3) -0.019(2) -0.002(2) -0.002(2) 
O3 0.049(2) 0.014(3) 0.045(2) -0.0021(18) 0.0116(19) 0.000(2) 
O4 0.037(2) 0.023(3) 0.064(3) -0.004(2) -0.009(2) -0.0072(18) 
O5 0.033(2) 0.030(3) 0.069(3) -0.016(2) -0.010(2) -0.005(2) 
O6 0.029(2) 0.030(3) 0.066(3) -0.015(2) 0.001(2) 0.006(2) 
O7 0.064(3) 0.055(4) 0.059(3) 0.003(2) 0.004(2) 0.020(3) 
O8 0.044(3) 0.070(4) 0.073(3) 0.017(3) 0.017(2) 0.008(2) 
O9 0.132(6) 0.195(8) 0.160(7) 0.127(7) 0.053(5) 0.065(5) 
 
_geom_special_details 
; 
 All esds (except the esd in the dihedral angle between two l.s. planes) 
 are estimated using the full covariance matrix.  The cell esds are taken 
 into account individually in the estimation of esds in distances, angles 
 and torsion angles; correlations between esds in cell parameters are only 
 used when they are defined by crystal symmetry.  An approximate (isotropic) 
 treatment of cell esds is used for estimating esds involving l.s. planes. 
; 
 
loop_ 
 _geom_bond_atom_site_label_1 
 _geom_bond_atom_site_label_2 
 _geom_bond_distance 
 _geom_bond_site_symmetry_2 
 _geom_bond_publ_flag 
Pr1 O5 2.389(4) 2_665 ? 
Pr1 O6 2.395(4) 5_765 ? 
Pr1 O3 2.410(4) . ? 
Pr1 O1 2.475(4) 6_656 ? 
Pr1 O4 2.483(4) 6_656 ? 
Pr1 O2 2.529(4) . ? 
Pr1 O7 2.609(4) . ? 
Pr1 O8 2.734(4) . ? 
Pr1 O1 2.878(4) . ? 
C1 O4 1.240(6) . ? 
C1 O3 1.279(6) . ? 
C1 C2 1.494(7) . ? 
C2 C3 1.378(6) . ? 
C2 C4 1.401(6) . ? 
C3 C2 1.378(6) 7_575 ? 
C3 H3 0.9300 . ? 
C4 C5 1.362(6) . ? 
C4 H4 0.9300 . ? 
C5 C4 1.362(6) 7_575 ? 
C5 N2 1.460(9) . ? 
C6 O2 1.268(6) . ? 
C6 O1 1.269(6) . ? 
C6 C7 1.493(7) . ? 
C7 C8 1.390(7) . ? 
C7 C12 1.388(7) . ? 
C8 C9 1.376(7) . ? 
C8 H8 0.9300 . ? 
C9 C10 1.365(7) . ? 
C9 N3 1.480(6) . ? 
C10 C11 1.395(7) . ? 
C10 H10 0.9300 . ? 
C11 C12 1.365(6) . ? 
C11 C13 1.489(7) . ? 
C12 H12 0.9300 . ? 
C13 O6 1.253(6) . ? 
C13 O5 1.273(6) . ? 
N1 O8 1.233(6) . ? 
N1 O9 1.253(7) . ? 
N1 O7 1.258(7) . ? 
N2 H2A 0.8600 . ? 
N2 H2B 0.8600 . ? 
N3 H3A 0.8900 . ? 
N3 H3B 0.8900 . ? 
N3 H3C 0.8900 . ? 
O1 Pr1 2.475(4) 6_556 ? 
O4 Pr1 2.483(4) 6_556 ? 
O5 Pr1 2.389(4) 2_664 ? 
O6 Pr1 2.395(4) 5_765 ? 
 
loop_ 
 _geom_angle_atom_site_label_1 
 _geom_angle_atom_site_label_2 
 _geom_angle_atom_site_label_3 
 _geom_angle 
 _geom_angle_site_symmetry_1 
 _geom_angle_site_symmetry_3 
 _geom_angle_publ_flag 
O5 Pr1 O6 79.57(13) 2_665 5_765 ? 
O5 Pr1 O3 82.83(12) 2_665 . ? 
O6 Pr1 O3 156.56(13) 5_765 . ? 
O5 Pr1 O1 76.77(12) 2_665 6_656 ? 
O6 Pr1 O1 79.48(13) 5_765 6_656 ? 
O3 Pr1 O1 81.51(13) . 6_656 ? 
O5 Pr1 O4 150.07(13) 2_665 6_656 ? 
O6 Pr1 O4 111.34(12) 5_765 6_656 ? 
O3 Pr1 O4 77.68(12) . 6_656 ? 
O1 Pr1 O4 78.06(12) 6_656 6_656 ? 
O5 Pr1 O2 74.32(14) 2_665 . ? 
O6 Pr1 O2 73.72(12) 5_765 . ? 
O3 Pr1 O2 116.08(12) . . ? 
O1 Pr1 O2 143.44(13) 6_656 . ? 
O4 Pr1 O2 134.91(13) 6_656 . ? 
O5 Pr1 O7 142.35(14) 2_665 . ? 
O6 Pr1 O7 78.75(14) 5_765 . ? 
O3 Pr1 O7 124.19(14) . . ? 
O1 Pr1 O7 128.17(13) 6_656 . ? 
O4 Pr1 O7 67.33(13) 6_656 . ? 
O2 Pr1 O7 70.23(14) . . ? 
O5 Pr1 O8 132.37(13) 2_665 . ? 
O6 Pr1 O8 124.45(14) 5_765 . ? 
O3 Pr1 O8 78.96(14) . . ? 
O1 Pr1 O8 141.47(13) 6_656 . ? 
O4 Pr1 O8 65.52(13) 6_656 . ? 
O2 Pr1 O8 75.06(14) . . ? 
O7 Pr1 O8 47.65(13) . . ? 
O5 Pr1 O1 70.92(11) 2_665 . ? 
O6 Pr1 O1 118.87(11) 5_765 . ? 
O3 Pr1 O1 68.70(12) . . ? 
O1 Pr1 O1 138.02(9) 6_656 . ? 
O4 Pr1 O1 120.96(11) 6_656 . ? 
O2 Pr1 O1 47.52(11) . . ? 
O7 Pr1 O1 93.49(13) . . ? 
O8 Pr1 O1 61.48(12) . . ? 
O4 C1 O3 122.6(5) . . ? 
O4 C1 C2 118.7(5) . . ? 
O3 C1 C2 118.6(5) . . ? 
C3 C2 C4 119.7(5) . . ? 
C3 C2 C1 119.2(5) . . ? 
C4 C2 C1 121.1(5) . . ? 
C2 C3 C2 120.2(6) 7_575 . ? 
C2 C3 H3 119.9 7_575 . ? 
C2 C3 H3 119.9 . . ? 
C5 C4 C2 119.2(5) . . ? 
C5 C4 H4 120.4 . . ? 
C2 C4 H4 120.4 . . ? 
C4 C5 C4 121.9(7) 7_575 . ? 
C4 C5 N2 119.1(3) 7_575 . ? 
C4 C5 N2 119.1(3) . . ? 
O2 C6 O1 120.4(5) . . ? 
O2 C6 C7 117.2(5) . . ? 
O1 C6 C7 122.3(5) . . ? 
C8 C7 C12 120.4(5) . . ? 
C8 C7 C6 120.2(5) . . ? 
C12 C7 C6 119.4(5) . . ? 
C9 C8 C7 118.0(5) . . ? 
C9 C8 H8 121.0 . . ? 
C7 C8 H8 121.0 . . ? 
C10 C9 C8 122.0(5) . . ? 
C10 C9 N3 118.0(5) . . ? 
C8 C9 N3 119.9(5) . . ? 
C9 C10 C11 119.7(5) . . ? 
C9 C10 H10 120.2 . . ? 
C11 C10 H10 120.2 . . ? 
C12 C11 C10 119.2(5) . . ? 
C12 C11 C13 120.7(5) . . ? 
C10 C11 C13 120.1(5) . . ? 
C11 C12 C7 120.6(5) . . ? 
C11 C12 H12 119.7 . . ? 
C7 C12 H12 119.7 . . ? 
O6 C13 O5 124.5(5) . . ? 
O6 C13 C11 118.1(5) . . ? 
O5 C13 C11 117.3(5) . . ? 
O8 N1 O9 120.2(7) . . ? 
O8 N1 O7 120.4(6) . . ? 
O9 N1 O7 119.3(7) . . ? 
C5 N2 H2A 120.0 . . ? 
C5 N2 H2B 120.0 . . ? 
H2A N2 H2B 120.0 . . ? 
C9 N3 H3A 109.5 . . ? 
C9 N3 H3B 109.5 . . ? 
H3A N3 H3B 109.5 . . ? 
C9 N3 H3C 109.5 . . ? 
H3A N3 H3C 109.5 . . ? 
H3B N3 H3C 109.5 . . ? 
C6 O1 Pr1 148.0(3) . 6_556 ? 
C6 O1 Pr1 87.5(3) . . ? 
Pr1 O1 Pr1 114.04(14) 6_556 . ? 
C6 O2 Pr1 104.2(3) . . ? 
C1 O3 Pr1 130.6(3) . . ? 
C1 O4 Pr1 111.8(4) . 6_556 ? 
C13 O5 Pr1 140.8(4) . 2_664 ? 
C13 O6 Pr1 143.8(4) . 5_765 ? 
N1 O7 Pr1 98.5(4) . . ? 
N1 O8 Pr1 93.1(4) . . ? 
 
_diffrn_measured_fraction_theta_max    0.935 
_diffrn_reflns_theta_full              24.99 
_diffrn_measured_fraction_theta_full   0.935 
_refine_diff_density_max    0.670 
_refine_diff_density_min   -0.547 
_refine_diff_density_rms    0.112 

loop_
  _platon_squeeze_void_nr
  _platon_squeeze_void_average_x
  _platon_squeeze_void_average_y
  _platon_squeeze_void_average_z
  _platon_squeeze_void_volume
  _platon_squeeze_void_count_electrons
  _platon_squeeze_void_content
   1  0.034  0.250  0.250       520       128 ' '
   2 -0.124  0.750  0.750       520       128 ' '
_platon_squeeze_details
;
the four water solvent of disorder within the cavity have been squeezed
out, TGA showed that there are four water molecules in the asymmetric unit 
;

_vrf_PLAT029_Pr2
;
PROBLEM: _diffrn_measured_fraction_theta_full Low .......       0.94      
RESPONSE: TGA, element analysis and IR spectrum have also been validated the 
single crystal structure 
;
_vrf_PLAT601_Pr2
;
PROBLEM: Structure Contains Solvent Accessible VOIDS of .     521.00 A**3 
RESPONSE: all disordered water solvent have been squeezed out of the cavity.  
;
# end Validation Reply Form
